# Supplementary material for: Prevalence, symptom burden, and natural history of deep vein thrombosis in people with advanced cancer in specialist palliative care units (HIDDen): a prospective longitudinal observational study
Source: PubMed Central journal article supplement (PMC6352715; doi:10.1016/s2352-3026(18)30215-1), 2019-01-29
Supplement: mmc1.pdf [file mmc1.pdf]

# THE LANCET

## Haematology

### Supplementary appendix

This appendix formed part of the original submission and has been peer reviewed. We post it as supplied by the authors.

Supplement to: White C, Noble SIR, Watson M, et al. Prevalence, symptom burden, and natural history of deep vein thrombosis in people with advanced cancer in specialist palliative care units (HIDDEN): a prospective longitudinal observational study. *Lancet Haematol* 2019; **6**: e79–88.

## Recruitment sites and number of patients recruited

| Recruitment site            | Principal Investigator | Number of patients recruited |
|-----------------------------|------------------------|------------------------------|
| Princess Alice, Esher, Kent | Bernadette Lee         | 70                           |
| Macmillan Unit, Antrim      | Jayne McAuley          | 81                           |
| Marie Curie Hospice Cardiff | Simon Noble            | 58                           |
| Northern Ireland hospice    | Clare White            | 129                          |
| Marie Curie Hospice Belfast | Jennifer Doherty       | 49                           |
